# Supplementary material
Source: PubMed Central journal article supplement (PMC387340)
Supplement: pnas_101_14_4865__1.pdf [file pnas_101_14_4865__1.pdf]

Table 2. Characteristics of deleted sequences found in *Mycobacterium tuberculosis*.

| Region of difference (RD) | Synonym (ref.) <sup>†</sup>        | Start   | Stop    | Size (bp) | Frequency | Genes deleted                                                                                                                                   | Isolates                                                                                                                                                                                                          |
|---------------------------|------------------------------------|---------|---------|-----------|-----------|-------------------------------------------------------------------------------------------------------------------------------------------------|-------------------------------------------------------------------------------------------------------------------------------------------------------------------------------------------------------------------|
| 105                       | New                                | 79567   | 83034   | 3,467     | 23        | Rv0071, Rv0072, Rv0073, Rv0074                                                                                                                  | 8, 11, 19, 26, 27, 28, 34, 41, 47, 55, 58, 67, 69, 80, 84, 85, 87, 89, 91, 93, 94, 95, 97                                                                                                                         |
| 108                       | New                                | 96640   | 99257   | 2,617     | 1         | hvcE, Rv0088, Rv0089, Rv0090                                                                                                                    | 26                                                                                                                                                                                                                |
| 109c                      | DS1 (12)                           | 170066  | 173786  | 3,780     | 1         | Rv0143c, Rv0144, Rv0145, Rv0146, Rv0147                                                                                                         | 14                                                                                                                                                                                                                |
| 110                       | New                                | 229868  | 231699  | 1,831     | 1         | Rv0194, Rv0195, Rv0196                                                                                                                          | 45                                                                                                                                                                                                                |
| 110a                      | New                                | 254000  | 257596  | 3,596     | 1         | fadD4, nadR, Rv0213c                                                                                                                            | 94                                                                                                                                                                                                                |
| 110b                      | New                                | 289421  | 289884  | 464       | 1         | Rv0240, Rv0241c                                                                                                                                 | 5                                                                                                                                                                                                                 |
| 110c                      | New                                | 289975  | 290079  | 105       | 1         | Rv0241c                                                                                                                                         | 5                                                                                                                                                                                                                 |
| 115                       | DS2 (12)                           | 453364  | 455971  | 2,607     | 5         | Rv0376c, Rv0377, Rv0378                                                                                                                         | 4, 14, 23, 57, 86                                                                                                                                                                                                 |
| 116                       | New                                | 466045  | 468298  | 2,253     | 2         | PPE9, Rv0386, Rv0387c                                                                                                                           | 76, 83                                                                                                                                                                                                            |
| 117                       | New                                | 483941  | 490773  | 6,832     | 1         | fadD30, pks6, Rv0406c                                                                                                                           | 92                                                                                                                                                                                                                |
| 120                       | New                                | 608539  | 610958  | 2,419     | 1         | Rv0517, Rv0518                                                                                                                                  | 68                                                                                                                                                                                                                |
| 121                       | New                                | 663094  | 665815  | 2,721     | 1         | nrz, Rv0571c, Rv0572c                                                                                                                           | 92                                                                                                                                                                                                                |
| 122                       | New                                | 669793  | 670964  | 1,171     | 3         | Rv0576                                                                                                                                          | 61, 62, 99                                                                                                                                                                                                        |
| 127                       | New                                | 746518  | 747805  | 1,287     | 1         | fabD2, Rv0650                                                                                                                                   | 67                                                                                                                                                                                                                |
| 129                       | New                                | 769380  | 770002  | 622       | 1         | end, Rv0669c                                                                                                                                    | 47                                                                                                                                                                                                                |
| 130                       | New                                | 840968  | 841927  | 959       | 3         | Rv0748, Rv0749, Rv0749A                                                                                                                         | 7, 56, 70                                                                                                                                                                                                         |
| 131ab                     | New                                | 888345  | 888786  | 441       | 2         | Rv0794c                                                                                                                                         | 46, 79                                                                                                                                                                                                            |
| 131c                      | New                                | 889015  | 890374  | 1,359     | 1         | Rv0795, Rv0796                                                                                                                                  | 83                                                                                                                                                                                                                |
| 132                       | New                                | 944124  | 949487  | 5,363     | 1         | cvsK2, fadD16, lpaS, ndc, Rv0846c, Rv0849, Rv0850, Rv0851c                                                                                      | 66                                                                                                                                                                                                                |
| 134                       | New                                | 1074123 | 1075946 | 1,823     | 1         | lprP, Rv0961, Rv0963c                                                                                                                           | 18                                                                                                                                                                                                                |
| 141a                      | New                                | 1243194 | 1243872 | 678       | 1         | Rv1120c, zwf1                                                                                                                                   | 62                                                                                                                                                                                                                |
| 142                       | New                                | 1332182 | 1335033 | 2,851     | 3         | Rv1190, Rv1191, Rv1192, sigI                                                                                                                    | 28, 58, 84                                                                                                                                                                                                        |
| 145                       | New                                | 1519817 | 1524570 | 4,753     | 5         | moeY, Rv1353c, Rv1354c, Rv1356c                                                                                                                 | 18, 22, 35, 40, 81                                                                                                                                                                                                |
| 145a                      | New                                | 1526655 | 1529302 | 2,647     | 1         | Rv1358                                                                                                                                          | 23                                                                                                                                                                                                                |
| 147b                      | New                                | 1691098 | 1694977 | 3,879     | 1         | Rv1500, Rv1501, Rv1502, Rv1503c, Rv1504c                                                                                                        | 71                                                                                                                                                                                                                |
| 147c                      | DS4 (12)                           | 1718908 | 1721211 | 2,303     | 16        | Rv1524, Rv1526c, wbbL2                                                                                                                          | 12, 25, 29, 31, 36, 39, 42, 46, 48, 75, 76, 77, 79, 83, 90, 92                                                                                                                                                    |
| 149                       | DS5 (12)<br>RD3 (17)               | 1779264 | 1788512 | 9,248     | 54        | Rv1572c, Rv1573, Rv1574, Rv1575, Rv1575A, Rv1576c, Rv1577c, Rv1578c, Rv1579c, Rv1580c, Rv1581c, Rv1582c, Rv1583c, Rv1584c, Rv1585c, Rv1586c     | 2, 4, 7, 8, 9, 10, 11, 14, 15, 19, 20, 23, 26, 27, 28, 30, 33, 34, 38, 41, 43, 47, 53, 55, 56, 57, 58, 59, 60, 65, 66, 67, 68, 69, 70, 71, 72, 74, 76, 80, 83, 84, 85, 86, 87, 88, 89, 91, 93, 94, 95, 96, 97, 98 |
| 150                       | New                                | 1896862 | 1899349 | 2,487     | 6         | Rv1671, Rv1672c, Rv1673c, Rv1674c                                                                                                               | 47, 55, 67, 69, 95, 97                                                                                                                                                                                            |
| 152                       | DS6 (12)<br>DS6L (12)<br>RD14 (17) | 1986636 | 1998621 | 11,985    | 20        | cut1, plcD, Rv1754c, Rv1756c, Rv1757c, Rv1760, Rv1761c, Rv1762c, Rv1763, Rv1764, Rv1765c, wag22                                                 | 8, 11, 26, 28, 34, 41, 47, 55, 58, 67, 69, 80, 84, 85, 87, 91, 93, 94, 95, 97                                                                                                                                     |
| 163                       | New                                | 2127981 | 2128972 | 991       | 1         | glnA3                                                                                                                                           | 45                                                                                                                                                                                                                |
| 164                       | New                                | 2139721 | 2140029 | 308       | 1         | Rv1891                                                                                                                                          | 63                                                                                                                                                                                                                |
| 165*                      | New                                | 2153059 | 2153384 | 325       | 1         | Rv1907c                                                                                                                                         | 80                                                                                                                                                                                                                |
| 166*                      | New                                | 2153074 | 2161125 | 8,051     | 1         | aceAa, fadB5, furA, katG, lppC, Rv1907c, Rv1910c, Rv1913, Rv1914c                                                                               | 41                                                                                                                                                                                                                |
| 167                       | New                                | 2179562 | 2180648 | 1,086     | 1         | Rv1927, Rv1928c                                                                                                                                 | 6                                                                                                                                                                                                                 |
| 168                       | New                                | 2198472 | 2200488 | 2,016     | 1         | Rv1948c, Rv1949c, Rv1950c, Rv1951c                                                                                                              | 52                                                                                                                                                                                                                |
| 171                       | DS7 (12)                           | 2225938 | 2228587 | 2,649     | 1         | cbp21, PE, PGRS35                                                                                                                               | 70                                                                                                                                                                                                                |
| 172*                      | New                                | 2235688 | 2238062 | 2,374     | 1         | ctpG, Rv1993c, Rv1994c                                                                                                                          | 46                                                                                                                                                                                                                |
| 172a*                     | New                                | 2235720 | 2237376 | 1,656     | 1         | ctpG, Rv1993c                                                                                                                                   | 5                                                                                                                                                                                                                 |
| 174*                      | New                                | 2237049 | 2240699 | 3,650     | 10        | ctpF, ctpG, Rv1993c, Rv1994c, Rv1995, Rv1996                                                                                                    | 2, 9, 10, 15, 33, 43, 65, 68, 72, 74                                                                                                                                                                              |
| 174a                      | New                                | 2245203 | 2248532 | 3,329     | 1         | fabG3, Rv2000, Rv2001                                                                                                                           | 78                                                                                                                                                                                                                |
| 175a                      | New                                | 2263448 | 2263637 | 189       | 1         | Rv2016                                                                                                                                          | 10                                                                                                                                                                                                                |
| 178                       | New                                | 2361907 | 2363681 | 1,774     | 5         | helZ, Rv2102                                                                                                                                    | 18, 22, 35, 40, 81                                                                                                                                                                                                |
| 181                       | New                                | 2535429 | 2536140 | 711       | 22        | Rv2262c, Rv2263                                                                                                                                 | 8, 11, 19, 26, 27, 28, 34, 41, 47, 55, 58, 67, 69, 80, 84, 85, 87, 91, 93, 94, 95, 97                                                                                                                             |
| 182*                      | New                                | 2545194 | 2551674 | 6,480     | 5         | cyp121, lppN, Rv2271, Rv2272, Rv2273, Rv2274c, Rv2275, Rv2277c, Rv2278, Rv2279, Rv2280                                                          | 18, 22, 35, 40, 81                                                                                                                                                                                                |
| 182a*                     | New                                | 2546463 | 2548424 | 1,961     | 1         | cyp121, Rv2274c, Rv2275                                                                                                                         | 87                                                                                                                                                                                                                |
| 183                       | DS8 (12)                           | 2585853 | 2588770 | 2,917     | 4         | Rv2313c, Rv2314c, Rv2315c                                                                                                                       | 7, 30, 56, 70                                                                                                                                                                                                     |
| 188                       | DS9 (12)<br>RD5 (17)               | 2631495 | 2636952 | 5,457     | 1         | plcA, PPE38, PPE39, Rv2354, Rv2355                                                                                                              | 64                                                                                                                                                                                                                |
| 193                       | DS33 (12)                          | 2704306 | 2704807 | 501       | 2         | Rv2406c, Rv2407                                                                                                                                 | 51, 96                                                                                                                                                                                                            |
| 196*                      | New                                | 2866467 | 2867123 | 656       | 1         | lppA                                                                                                                                            | 1                                                                                                                                                                                                                 |
| 196b*                     | New                                | 2867119 | 2867776 | 657       | 1         | lppA, lppB                                                                                                                                      | 8                                                                                                                                                                                                                 |
| 198a                      | DS10 (12)<br>RD11 (17)             | 2969986 | 2980968 | 10,982    | 4         | Rv2645, Rv2646, Rv2647, Rv2648, Rv2649, Rv2650c, Rv2651c, Rv2652c, Rv2653c, Rv2654c, Rv2655c, Rv2656c, Rv2657c, Rv2658c, Rv2659c, Rv2660c, valI | 54, 76, 83, 90                                                                                                                                                                                                    |
| 202                       | New                                | 3106808 | 3107653 | 845       | 1         | Rv2797c, Rv2798c                                                                                                                                | 48                                                                                                                                                                                                                |
| 203                       | New                                | 3111817 | 3115331 | 3,514     | 1         | Rv2802c, Rv2803, Rv2804c, Rv2805, Rv2806, Rv2807, Rv2808                                                                                        | 66                                                                                                                                                                                                                |
| 206                       | New                                | 3119367 | 3119757 | 390       | 1         | 6 repeats and spacers of the DR region                                                                                                          | 15                                                                                                                                                                                                                |
| 207*                      | New                                | 3120521 | 3127920 | 7,399     | 22        | Rv2814c, Rv2815c, Rv2816c, Rv2817c, Rv2818c, Rv2819c, Rv2820c                                                                                   | 8, 11, 19, 26, 27, 28, 34, 41, 47, 55, 58, 67, 69, 80, 84, 85, 87, 89, 91, 93, 94, 95                                                                                                                             |
| 210*                      | New                                | 3120428 | 3123023 | 2,595     | 1         | Rv2814c, Rv2815c                                                                                                                                | 60                                                                                                                                                                                                                |
| 213a                      | New                                | 3288356 | 3290565 | 2,209     | 1         | Rv2943, Rv2943A, Rv2944                                                                                                                         | 13                                                                                                                                                                                                                |
| 219                       | New                                | 3448504 | 3451396 | 2,892     | 8         | lprR, Rv3083, Rv3085                                                                                                                            | 1, 16, 21, 32, 44, 52, 78, 100                                                                                                                                                                                    |
| 223                       | New                                | 3551227 | 3555381 | 4,154     | 1         | Rv3184, Rv3185, Rv3186, Rv3187, Rv3188, Rv3189                                                                                                  | 48                                                                                                                                                                                                                |
| 231                       | New                                | 3868776 | 3869667 | 891       | 2         | Rv3448                                                                                                                                          | 38, 60                                                                                                                                                                                                            |
| 236*                      | RD8 (17)                           | 4056659 | 4058978 | 2,319     | 10        | ephA, Rv3618                                                                                                                                    | 12, 17, 29, 39, 42, 46, 48, 75, 77, 79                                                                                                                                                                            |
| 236a*                     | RD8 (17)                           | 4056942 | 4058393 | 1,451     | 2         | ephA                                                                                                                                            | 76, 83                                                                                                                                                                                                            |
| 239                       | New                                | 4092077 | 4092919 | 842       | 17        | Rv3651                                                                                                                                          | 12, 17, 25, 29, 31, 36, 39, 42, 46, 48, 75, 76, 77, 79, 83, 90, 92                                                                                                                                                |
| 246                       | New                                | 4209435 | 4211499 | 2,064     | 1         | lppHRv3764c, Rv3765c                                                                                                                            | 36                                                                                                                                                                                                                |
| 247*                      | New                                | 4212648 | 4215043 | 2,395     | 1         | Rv3766, Rv3767c, Rv3768, Rv3769                                                                                                                 | 59                                                                                                                                                                                                                |
| 247b*                     | New                                | 4212911 | 4215050 | 2,139     | 2         | Rv3766, Rv3767c, Rv3768, Rv3769                                                                                                                 | 16, 44                                                                                                                                                                                                            |
| 252*                      | New                                | 4370419 | 4373230 | 2,811     | 4         | Rv3887c, Rv3888c, Rv3889c                                                                                                                       | 7, 30, 56, 70                                                                                                                                                                                                     |
| 252b*                     | New                                | 4371815 | 4373774 | 1,959     | 1         | Rv3888c, Rv3889c, Rv3890c                                                                                                                       | 13                                                                                                                                                                                                                |

\*Overlapping deletions that occur at the same genomic locus.

<sup>†</sup>New deletions that were identified in this study. Deletions identified previously are shown with reference.
