# Supplementary material
Source: PubMed Central journal article supplement (PMC387340)
Supplement: pnas_101_14_4865__2.pdf [file pnas_101_14_4865__2.pdf]

Table 3. Flanking sequence of deletion and PCR primers

| Region of difference (RD) | L* - Flanking Sequence (5'-3') | R <sup>1</sup> - Flanking Sequence (5'-3') | L* - PCR Primer (5'-3')             | R <sup>1</sup> - PCR Primer (5'-3') |
|---------------------------|--------------------------------|--------------------------------------------|-------------------------------------|-------------------------------------|
| 105                       | CGTGGTCGCC                     | GTGGGACGGG                                 | GGAGTCGTTGAGGGTGTTCATCAGCTCAGTC     | CGCCAAGCCGCATAGTCACGGTGC            |
| 108                       | ACACCCGGTCC                    | ATTCCACACT                                 | CGCCGCTCTGCCGCTCTT                  | GACAGGACACCCGCGAGATACG              |
| 109c                      | CGCCCAAGGC                     | CGGAAATCGC                                 | CGCCCGAGCGATGGTCAAG                 | TCGGCTCAGCGTCCGGTTTTTC              |
| 110                       | CGACCCATG                      | GGAGCCACCC                                 | CGCCCGAATACCGGGGACTG                | CACCGGTTGGGACGCAATC                 |
| 110a                      | GAGCCAAGGC                     | TCGCGTTGGA                                 | GAACCTGCGCTGATCGAAGAATGG            | GGTGTGATGCGCGTGTATGTGC              |
| 110b                      | GCCGCTTCC                      | CGGTTTTCCG                                 | GCGCGGTATCGCCACTGAGA                | CTATCCGTTGCGGTGACTTTTCCATC          |
| 110c                      | GAAGCGATG                      | TGTGATCGCC                                 | GCGCGGTATCGCCACTGAGA                | CTATCCGTTGCGGTGACTTTTCCATC          |
| 115                       | GAGACCCGG                      | CCCCATGAGT                                 | TTCCGGGGCCAGGTCTGTGAT               | CCGCGGAATGCTGCTGTAT                 |
| 116                       | TGGTGTGACG                     | ATAATTGAGC                                 | CCTGGCCAGAGCGGTAGACGAC              | CAAGGGATCCGACGACCAAGAACG            |
| 117                       | CCGGGTGGCC                     | AAGAACTGGT                                 | GGCGGGCCAGAGCTCTGTAGA               | CTGGTGGCCAAAGGTGAA                  |
| 120                       | TCATCAATAG                     | TCCCAACGCT                                 | AGTCTCATCGAGGATGCACAAGAGCGAGATG     | CGTGTGGGCTGCCCGGCTG                 |
| 121                       | CGCGCCGAG                      | AGTCCGAAAT                                 | AGTCCCGGGTGTGGTCTCC                 | GCTTTTGGCTGCCCGTGTCC                |
| 122                       | GGTCTCTGT                      | GGTGTGCGG                                  | GCCGGCACCGCTAATCGCTACTT             | TTCTCTTGGGATGATCATCTTCTGGTTA        |
| 127                       | GCGCCGCGCC                     | CGCCTGCTGT                                 | GACTCCGATCTGGAGAGCTG                | CAGCGCGCCAGAAATGCTCAG               |
| 129                       | GCGCAGCACT                     | CGATCCCGTC                                 | GAAGCCGCTCTGTGGTCAAGTTG             | GCTGCGCGCGCTCCATC                   |
| 130                       | TACCCGGCTA                     | TGTCAATCTC                                 | ACCGTCCCGGTTTTCTGAC                 | GACCGAGTCGCCCACTATG                 |
| 131ab                     | ACCCGTCGCG                     | TACTACAAA                                  | CGGGCTCAGTCTTATGTCTCCAAGCCGAT       | GGCGCGGGTGGTGCATGTGAGTATG           |
| 131c                      | TCAAGTGAAG                     | GAGGCAACCA                                 | TGTTGGCCCGGCTCAATCA                 | GTGGCCAGGGTGGTGGTCTC                |
| 132                       | CGATGCCGG                      | GCCGAGGAAG                                 | GTCGGGATGGGCTAGGTG                  | CGCGTCACTCGGTGTCAACAA               |
| 134                       | GTAGCTTGA                      | GGTGTCCAAC                                 | GTTGGCCCTTTTCGAGGCTATCTGG           | GAGGATCGGGTCAAGCAATGGT              |
| 141a                      | CCCGTCACCC                     | GGTCAAGTGG                                 | CGGGCCGATTGGCCAGAG                  | GTAAAACCTTGGCCGGTCTCCAC             |
| 142                       | CATCGCGGTG                     | GCCGTGCTGC                                 | TCGCCGACGCAACCAAGCAG                | TCACTTCCATTTCCAGCGGCAACT            |
| 145                       | TTGGGAAGT                      | ACCGTCACTG                                 | CCGGCTAGGGCCATCGCCGT                | GCGGTGGCCGACGATTTCTGTGACAAT         |
| 145a                      | GCCCGCGAG                      | GACTACGGT                                  | ATCGCCCGCTTAAACTCTTCTCGTA           | ATCTTCTGCCCATCGCATAC                |
| 147b                      | GCCACGCCAC                     | GGGGGGGGT                                  | CAGCCCGGGGTTGGTCACTA                | CCATATCAGCATCGGTTACGGTGTGTGG        |
| 147c                      | CAGGAGCAGC                     | TCAGGGCTCG                                 | GCTCCGCTGCGCAGATTTT                 | GACGCGCGGACTCTGTG                   |
| 149                       | GTTGGTGGG                      | GGTGGCGGT                                  | CATGTCACTTGGCCGACGGGT               | CCAGGGATCTTCCAGCCAGCCACAC           |
| 150                       | ACGTTGAT                       | CTAGCGGCTC                                 | TGTTGGCTGGCTGGCAAAAG                | CGGGACGGCAACGGGTGAT                 |
| 152                       | ATCTCCGACC                     | CACCCACGA                                  | CCGGTTGAGCAATGGGATATCAGTGGAC        | TGGGATAGTTCAGGTGGCATCTGGGCAAT       |
| 163                       | CTTCCCGCG                      | AGCGCGGGT                                  | ATTTCCCGTGTGCTGCTCTGTC              | CGCGGAGTCCGGCATCGTTAC               |
| 164                       | CTCCCGGTG                      | CCGAAGCCG                                  | GGGGAAGCGGTGGCTGAG                  | TTCTGTGGCGGATCGGTAGTCG              |
| 165                       | GGTAAATCGC                     | ACAAATGGC                                  | GCTTTCGCTGCCGCTGTCTG                | GCTCGGGGTGCTGGTGT                   |
| 166                       | CGCCAACGCT                     | TCCTGGTCC                                  | CAAGGTTGGCAGCCGCTGCTTTGAA           | GTACTGCTGTCCGCAAGCGATAGAAAGAT       |
| 167                       | ATACGATGCC                     | GTTCAACCGG                                 | GCGCGTGGCGCATTAAGCTG                | TGCTGGACATCGCCGTGGAGA               |
| 168                       | TTACAGGTCA                     | GGAAAGTTTA                                 | GTTGTGCAACGAACTGGCCACGCCGA          | ACGTTGTGTCCAGGACGTAGGTACACAGTT      |
| 171                       | TCGGTACGCA                     | CGAAGTGGCG                                 | ATTGACGCTTTCATGGCG                  | CGGGTCTGCAACATACACT                 |
| 172                       | GGTCCGCCCC                     | CACAAGTTC                                  | GTTGTGCGCGGTGAGCATCTG               | TCCGTGTCCGCGATCAAGTCC               |
| 172a                      | GCGCGCTAT                      | GCGACTGTC                                  | GCGACGGTGGCATGGTGTG                 | GACCGGTGCCGATCTGCG                  |
| 174                       | ACCGCCGCG                      | CAAGGACGA                                  | GGTGCCTCCCGCAGAACTGTG               | AGCGCATCGAGCGGTGAA                  |
| 174a                      | CGCCCGGAC                      | CCCGGCCAA                                  | GCCAGGGCGCAAGATTC                   | CTACCGCACGCCCCCTTCTACA              |
| 175a                      | GGGACACAAGT                    | ACCCCGGAG                                  | ACGAGACAACGAAATCAGCGAACCCACCATGGAAA | TGGGTGATCCACCGCTCGGCCAAT            |
| 178                       | GCTGCTGGC                      | CGCGCACCG                                  | CCCGCGGCTCTGTGTG                    | CCGCCCGCTGTGTGAT                    |
| 181                       | GGGACCAAGC                     | AGTCTGACG                                  | CGCAACGGCCGGTGAACCT                 | CGGGCGCTCGCGGAACCTT                 |
| 182                       | GCCAACGGTC                     | GCCAGCTAT                                  | TGTTATACGCCCTGTCCGGTCAACCAT         | GCGCATCCCGCGGCTGTGGT                |
| 182a                      | CCCGCACGCA                     | CGGATCACT                                  | CGTGGGGCTTGTGCTGGT                  | AGCGGTTGGGGATGCGCTT                 |
| 183                       | GTCGCCGGC                      | GAAGTCTCA                                  | CGCAACGGCCCGCATCAAG                 | ACGACGGCCGAAACCCAGGAA               |
| 188                       | GGTCTGATGT                     | GCCCCCTCT                                  | ACCGCGGGATTGGACAGCAAGAT             | CGTCAACAGGGGCTTCTCAG                |
| 193                       | GACCAAGCT                      | TCGCGGCTG                                  | CCGACTACGCTGGCGCTAAACC              | GTAAGGGCCACCGGATGTCTAC              |
| 196                       | CCACAGCAG                      | TGATCGCAC                                  | TTCTGTGATGACCAACCCGATGAC            | TGGCGGTAGGATGCTGTTGAAT              |
| 196b                      | CTCGACGCCA                     | ACCCCGTGA                                  | GGCCGATCGCAACAGCTAAT                | CGCGGGCAGGATGCTATC                  |
| 198a                      | GGAAAGGTC                      | ACTGTTCAA                                  | GCTAAACCTCGGGCAGAAAG                | GACCGCAACAGCCGCTGATA                |
| 202                       | GGATGGGCG                      | CATCGAATG                                  | GGGTTCCGGGGCGGTGGTA                 | GGGATGCTCGGGCAGGCTCAA               |
| 203                       | GAGGTTGACGT                    | GCGCCTACCG                                 | CCCGGACGGCAAGAAGACGAGA              | CGCCCTCGGATTCAGAACTCAC              |
| 206                       | ACCGATCCGG                     | GTCCTCAGAC                                 | GACCGCAGCATGCCCTGTCT                | GTTGCCCGGCGCTTTTTC                  |
| 207*                      | CCGACCTGAA                     | TGAACCGCCC                                 | GACGAGTTCGCGCTCAAATGT               | CCCCGGGAGGAAACAGAA                  |
| 210*                      | ATTTAGCCT                      | GTCCTCAGAC                                 | GACGAGTTCGCGCTCAAATGT               | CCCCGGGAGGAAACAGAA                  |
| 213a                      | TACTGCTGCT                     | TGCCGTTGAC                                 | CAGTTGTTGGCGGTGAGTGGT               | TCCAAGCGCAAGTACCGAAGTGA             |
| 219                       | GGGTCCATGA                     | CGCGGTGGC                                  | GCGTGGTCCCACTGTC                    | GCGACGGGTTTTGTATG                   |
| 223                       | CGCCTTCAA                      | TCGCGCGAT                                  | AGGCAACTGGAACCTGGT                  | GGCGAGGCAAGCCGACATTTCTCATT          |
| 231                       | CGCCTCGGC                      | GGCGTGATC                                  | GGTCCCGCTCGGACTCTGAT                | TCACCGCGGCAACCCACTT                 |
| 236                       | CGCCTCGGC                      | TGCTGCTGA                                  | CCAGGATGTCGCGGCTGCT                 | CCAGGTAGGGGGGATGTGC                 |
| 236a                      | CGACGATGGA                     | ACTACATCGG                                 | GCTCATGCTGCCCGCTATCTCA              | CATCGCACTCAACCCCGTCCAG              |
| 239                       | ACGGACGAAT                     | GCTACCGTTG                                 | GGCCAACATCGACCACTACCC               | ATCTCGCTACCGGCACTCAT                |
| 246                       | GCCACTACAA                     | GATCTCCAC                                  | CAATGCCGATGGACCGCTACGAC             | CGCTGGCGGCTCGGAACG                  |
| 247                       | GACAAGTGGC                     | GTGCTGTTC                                  | GCGCGGTTATGGTTCCAATCC               | CGGACGCTCATCGCTGGT                  |
| 247b                      | GGAACAGGG                      | CAGGCTCC                                   | GCAACGGCGGCTCACATTC                 | CGGACGCTCATCGCTGGT                  |
| 252                       | CCCGCACAC                      | GACCCACAC                                  | TAACAACCGCATGATGCCAGCACTTCTAGCCATT  | ATGAAGTGCATGTGACGACGACGCTGAT        |
| 252b                      | CGGATCGAA                      | CGCCGATAT                                  | AGCCCGTGGATACCGATTCTGTA             | GGCGCGCGGGTATG                      |
